# Supplementary material
Source: HighWire-hosted journal article supplement (https://ajnr-sso.highwirestaging.com/highwire/filestream/52290/field_highwire_adjunct_files/0/2834_tables.pdf)
Supplement: 2834_tables.pdf [file 2834_tables.pdf]

**On-line Table 1: Histologic characteristics of lymphomas, NPCs, and poorly, moderately, and well-differentiated SCCs**

|            | Cell Attenuation  | Stromal Tissues | Necrosis   | Keratinized Deposits |
|------------|-------------------|-----------------|------------|----------------------|
| Lymphoma   | High              | (±)             | (-)        | (-)                  |
| NPC        | High              | (±)             | (-)        | (-)                  |
| PD T2 homo | Intermediate/high | (±) ~ (+)       | (-) ~ (±)  | (-) ~ (±)            |
| T2 hetero  | Intermediate/high | (+)             | (-) ~ (++) | (-) ~ (±)            |
| MD T2 homo | Intermediate      | (+)             | (-) ~ (±)  | (+)                  |
| T2 hetero  | Low/intermediate  | (+) ~ (++)      | (+)        | (+) ~ (++)           |
| WD         | Low/intermediate  | (++)            | (+)(++)    | (++)                 |

**Note:**—PD indicates poorly differentiated squamous cell carcinoma; homo, homogeneous; hetero, heterogeneous; MD, moderately differentiated squamous cell carcinoma; WD, well-differentiated squamous cell carcinoma; T2 homo/hetero, with homogeneous/heterogeneous T2 signals; stromal tissues: (±), faint; (+), intermediate; (++) , abundant amounts; necrosis/keratinized deposits: (-), absent; (±), faint; (+), moderate; (++) , large amounts.

**On-line Table 2: T2 MRI signal characteristics of lymphomas and carcinomas of the nasopharynx and oropharynx<sup>a</sup>**

|           | No. of Tumors Having Homogeneous/Heterogeneous T2 Signals |           |                              |                         |                           |                         |
|-----------|-----------------------------------------------------------|-----------|------------------------------|-------------------------|---------------------------|-------------------------|
|           | Nasopharynx                                               |           | Oropharynx                   |                         |                           |                         |
|           | Lymphoma                                                  | NPC       | Lymphoma                     | PD SCC                  | MD SCC                    | WD SCC                  |
| FST2WI    |                                                           |           |                              |                         |                           |                         |
| Homo      | 7                                                         | 8         | 17                           | 5                       | 3                         | 0                       |
| Hetero    | 0                                                         | 0         | 0                            | 4                       | 5                         | 7                       |
| CV (%)    |                                                           |           |                              |                         |                           |                         |
| T2 homo   | 8.2 ± 2.4                                                 | 8.3 ± 1.6 | 7.4 ± 1.6 <sup>b,c,d,f</sup> | 10.4 ± 2.9 <sup>b</sup> | 8.6 ± 1.3 <sup>d,e</sup>  | —                       |
| T2 hetero | —                                                         | —         | —                            | 16.4 ± 3.3 <sup>c</sup> | 13.4 ± 2.1 <sup>d,e</sup> | 14.8 ± 9.4 <sup>f</sup> |

**Note:**—FST2WI indicates fat-suppressed T2-weighted image; Homo, homogeneous; Hetero, heterogeneous; T2 homo/T2 hetero, homogeneous/heterogeneous T2 signals as assessed by qualitative analysis of fat-suppressed T2-weighted images; PD, poorly differentiated; MD, moderately differentiated; WD, well-differentiated.

<sup>a</sup> Heterogeneity of tumors on fat-suppressed T2-weighted images is expressed by CV (percentage ± SD).

<sup>b–f</sup> Significant differences (Mann-Whitney *U* test).

<sup>b</sup> *P* = .019.

<sup>c</sup> *P* < .001.

<sup>d</sup> *P* < .001.

<sup>e</sup> *P* = .036.

<sup>f</sup> *P* = .019.
